# Supplementary material
Source: PubMed Central journal article supplement (PMC2698997)
Supplement: NIHMS102100-supplement-suppl_1.pdf [file NIHMS102100-supplement-suppl_1.pdf]

## **Supplemental Material**

Supplementary Fig. 1: T<sub>conv</sub> cell contact potentiates T<sub>reg</sub> suppression.

Supplementary Fig. 2: Purify of and Foxp3 expression in sorted T<sub>conv</sub> and T<sub>reg</sub>.

Supplementary Fig. 3: IL-2 secretion in responder T<sub>conv</sub>

Supplementary Fig. 4: Capacity of polarized effector T cells to mediate suppression

Supplementary Table I: Real-time PCR primer and probe sequences

# Supplementary Fig. 1

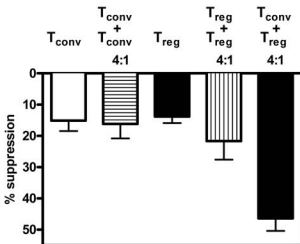

**$T_{conv}$  cell contact potentiates  $T_{reg}$  suppression.**  $T_{conv}$  or  $T_{reg}$  cells from C57BL/6, mice were purified by FACS. Cells assayed for regulatory capacity ( $T_{conv}$  or  $T_{reg}$  alone or in combination at a 4:1 ratio) were cultured in the top chambers of a Transwell™ culture plate as indicated. Freshly purified wild-type “responder”  $T_{conv}$  were cultured in the bottom chamber of the 96-well flat bottom plates in medium containing anti-CD3/anti-CD28-coated latex beads. After 60 h in culture, top chambers were removed and [ $^3$ H]-thymidine was added directly to the responder  $T_{conv}$  cells in the bottom chambers of the original Transwell™ plate for the final 8 h of the 72 h assay. Cultures were harvested and cpm determined.

# Supplementary Fig. 2

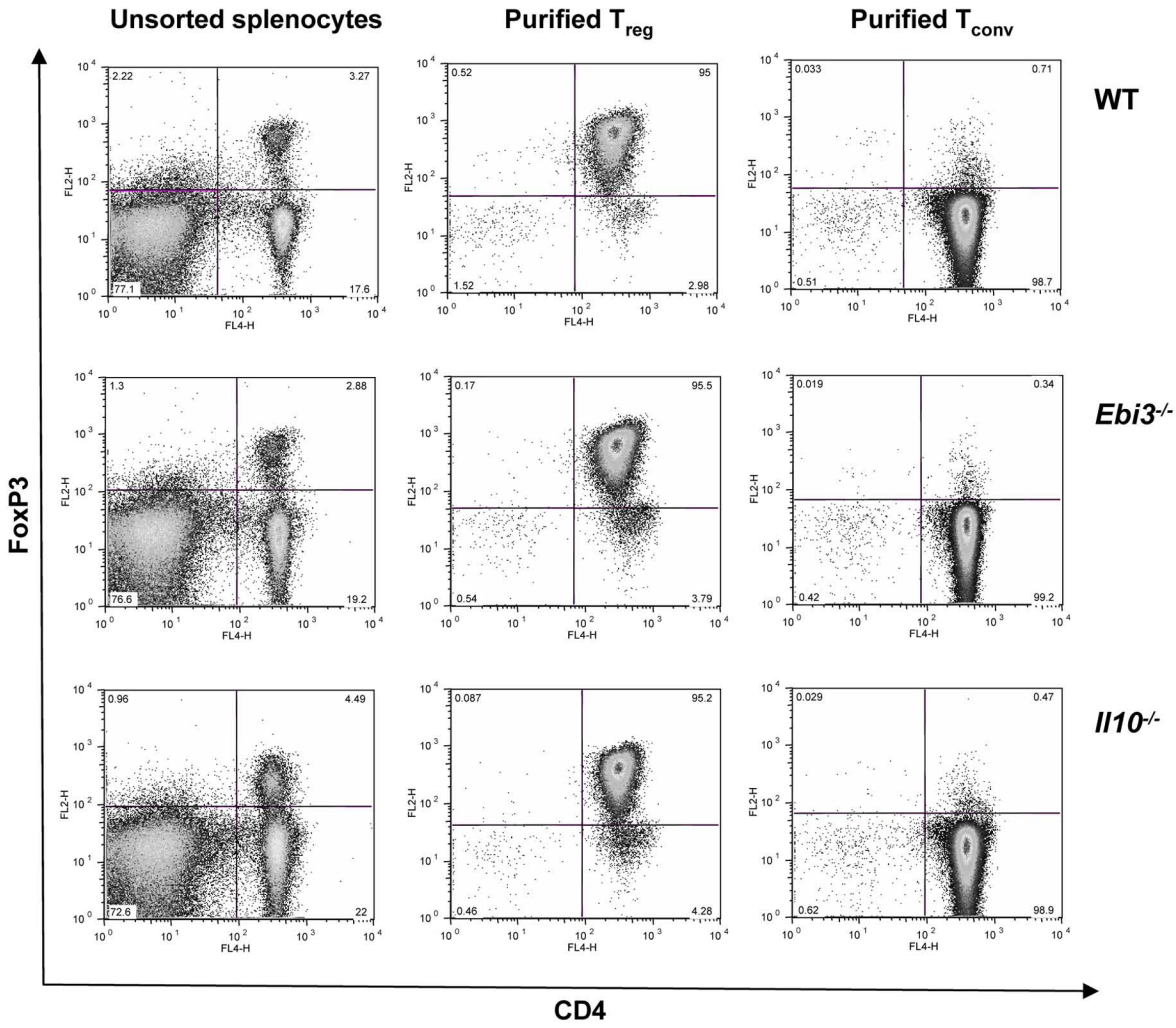

**Purify of and Foxp3 expression in sorted T<sub>conv</sub> and T<sub>reg</sub>.** WT, *Il10*<sup>-/-</sup>, *Ebi3*<sup>-/-</sup> splenocytes were processed and red blood cells lysed prior to staining with anti-CD4 and anti-Foxp3 antibodies. In parallel, T<sub>conv</sub> (CD4+CD25-CD45RB<sup>hi</sup>) and T<sub>reg</sub> (CD4+CD25+CD45RB<sup>lo</sup>) were sorted and purified cells were subsequently stained with anti-CD4 and anti-Foxp3 antibodies and % Foxp3<sup>+</sup> cells were determined by FACS.

# Supplementary Fig. 3

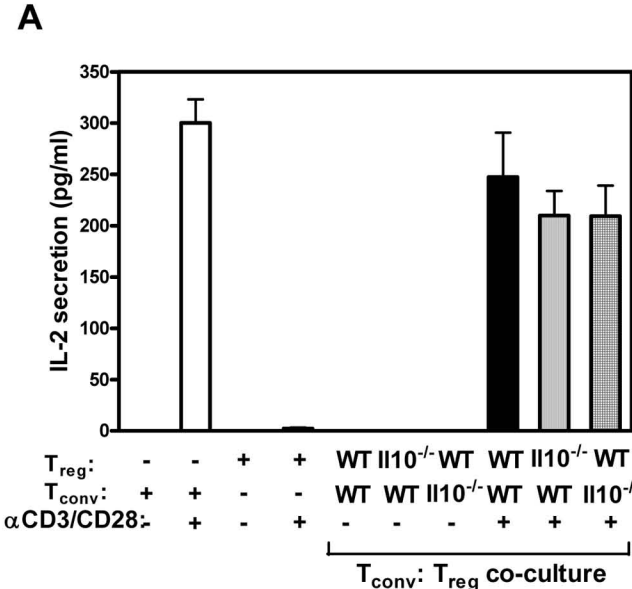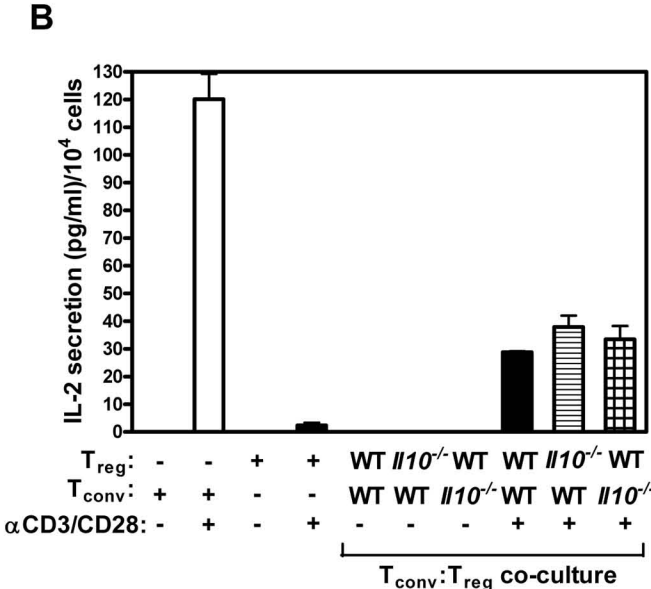

**IL-2 secretion in responder T<sub>conv</sub>.** Supernatants were collected from purified T<sub>conv</sub> or T<sub>reg</sub> cells cultured in the presence or absence of  $\alpha$ CD3/CD28 stimulation or T<sub>conv</sub>: T<sub>reg</sub> co-cultures under indicated conditions. IL-2 secretion was measured using Luminex™ technology. (A) Total IL-2 secretion in cell culture supernatant (B) IL-2 secretion relative to the number of T<sub>conv</sub> cells present in the culture (top and bottom chambers of the Transwell™. Data represent the mean  $\pm$  SEM of 3 independent experiments.

## Supplementary Fig. 4

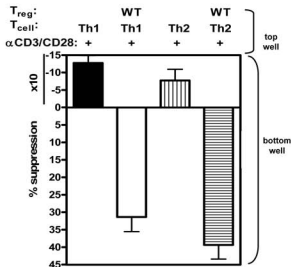

**Capacity of polarized effector T cells to mediate suppression.** MACS purified T cells were cultured under polarizing conditions for 6 d (Th1: rIL-12,  $\alpha$ IL-4, Th2: rIL-4,  $\alpha$ IFN $\gamma$ ). On day 6, cells were collected, washed and used in functional assays. Th1 or Th2 cells were cultured in combination with Treg at a 4:1 ratio in top chambers of a Transwell™ culture plate as indicated. Freshly purified wild-type “responder”  $T_{conv}$  were activated in the bottom chambers and their proliferation was measured by [3H]-thymidine incorporation. Data represent the mean  $\pm$  SEM of 3-5 independent experiments. Statistical analysis: \* $p < 0.05$ , \*\*  $p < 0.01$ . Counts per minute of  $T_{conv}$  cells activated alone were 25,000 – 60,000.

## Supplementary Table 1

|                                 | Forward                    | Reverse                   | Probe                     |
|---------------------------------|----------------------------|---------------------------|---------------------------|
| <i>Ebi3</i>                     | AGCAGCAGCCTCCTAGCCT        | ACGCCTCCGGAGGGTC          | ACGCCTCCGGAGGGTC          |
| <i>Il12 a (p35)</i>             | TGGCTACTAGAGAGACTTCTCCACAA | GCACAGGGTCATCATCAAAGAC    | AAGAGGGAGCTGCCTGCCCC      |
| <i>Il10</i>                     | TAGAGCTGCGGACTGCCTTC       | AGTCGGTTAGCAGTATGTTGTCCAG | ACTTCTTTCAAACAAAGGACCA    |
| <i>Il2</i>                      | CCTGAGCAGGATGGAGAATTACA    | TCCAGAACATGCCGACAGAG      | CCCAAGCAGGCCACAGAATTGAAAG |
| <i><math>\beta</math> actin</i> | ACCCACACTGTGCCATCTAC       | AGCCAAGTCCAGACGCAGG       | AGGGCTATGCTCTCCCTCACGCCA  |

Real-time PCR primer and probe sequences.
